# Supplementary material for: hMENA isoforms regulate cancer intrinsic type I IFN signaling and extrinsic mechanisms of resistance to immune checkpoint blockade in NSCLC
Source: PubMed Central journal article supplement — J Immunother Cancer. 2023 Aug 23;11(8):e006913. doi: 10.1136/jitc-2023-006913 (PMC10450042; doi:10.1136/jitc-2023-006913), 2023-08-23
Supplement: jitc-2023-006913supp001.pdf [file jitc-2023-006913supp001.pdf]

## **Additional file 1. Supplementary Methods, Supplementary Figures and Supplementary Tables**

### **Supplementary Methods**

#### **Cell lines RRID and culture treatments**

Research Resource Identifiers (RRIDs) of NSCLC cell lines are provided: A549 ATCC CCL-185, RRID:CVCL\_0023; NCI-H1299 ATCC CRL-5803, RRID: CVCL\_0060; NCI-H1650 CRL-5883, RRID:CVCL\_1483; HCC-2935 CRL-2869, RRID:CVCL\_1265; NCI-H2030 CRL-5914, RRID:CVCL\_1517; NCI-H1975 CRL-5908, RRID:CVCL\_1511.

Recombinant human IFN $\beta$  (#8499-IF-010, R&D Systems) was added to cell media at 50 ng/ml; anti-Interferon- $\alpha/\beta$  Receptor Chain 2 Antibody (Millipore Cat# MAB1155, RRID:AB\_2122758) was added at 1 $\mu$ g/ml; JAK Inhibitor I (#420099, Merck) at 5  $\mu$ M; human TGF $\beta$ 1(#240-B-010/CF, R&D Systems) at 5 ng/ml.

The RIG-I agonist M8 (kindly provided by John Hiscott, Istituto Pasteur Italia-Cenci Bolognetti Foundation) (1) was delivered to cells using Lipofectamine®RNAiMAX Transfection Reagent (#13778075, Invitrogen) according to the manufacturer's protocol. Polyinosinic-polycytidylic acid (poly I:C) (#4287; TOCRIS) was delivered to cells using Lipofectamine™ 2000 Transfection Reagent (#116680191, Invitrogen) at 1 $\mu$ g/ml, according to the manufacturer's instructions.

#### **Transfection and Small interfering RNA (siRNA)**

A549 cells were infected with pMSCV/pMSCV11a vectors (2). Selection was carried out with 500  $\mu$ g/ml of G418 (Invitrogen).

Transfection with siRNA was performed with Lipofectamine® RNAiMAX Transfection Reagent (#13778075, Invitrogen) according to the manufacturer's instructions. Cancer cells were transfected with: hMENA(t)-specific pooled siRNA duplexes (siGENOME SMART pool Human ENAH,

#FE5M021932020050), CDH1-specific pooled siRNA duplexes (siGENOME SMART pool Human CDH1, #M-003877-02), and ON-TARGET plus Non-targeting Control Pool (#FE5D0018101050), all from GE Healthcare, Dharmacon. DDX58-specific pooled of three siRNAs (DDX58 Silencer Pre-Designed siRNA, #134222) was from Ambion. Specific hMENA<sup>11a</sup> silencing was performed as previously reported (3). Knockdown efficiency was assessed by Quantitative real-time RT-PCR (qRT-PCR) and the effects of silencing were evaluated at 48-72 h from the transfection.

### RNA extraction and analysis

Total RNA (5 µg) was isolated from cells with Trizol reagent (Invitrogen) and reverse transcribed using first-strand cDNA synthesis kit (#27-9261-01, GE Healthcare) according to the manufacturer's protocol.

qRT-PCR was performed on an ABI Prism 7500 Real-time PCR instrument (Applied Biosystems). The reactions were carried out in triplicates. TaqMan Gene Expression Assays were used for the amplification and quantification of: STAT1 (Hs01013996\_m1; Applied Biosystems), CXCL8 (Hs00174103\_m1; Applied Biosystems), IL6 (Hs00174154\_m1; Applied Biosystems), CXCL1(Hs00236937\_m1; Applied Biosystems), CDH1(Hs01013953\_m1; Applied Biosystems), CD274 (Hs01125301\_m1; Applied Biosystems), DDX58 (Hs01861436\_m1; Applied Biosystems), ISG15 (Hs00192713\_m1; Applied Biosystems), MX1 (Hs00895608\_m1; Applied Biosystems), OASL (Hs00984387\_m1; Applied Biosystems), IFI44L (Hs00915292\_m1; Applied Biosystems), ENAH (Hs00403109\_m1; Applied Biosystems), IFNB1 (Hs.PT.58.39481063.g; Integrated DNA Technologies). qRT-PCR for hMENA<sup>11a</sup> mRNA quantification was performed with custom designed probe and primers from Applied Biosystems (TaqMan MGB Probe: 5'-CTCCAGACGGGATTCT-3'; forward primer: 5'-ATGGCAGCAAGTCACCTGTTAT-3'; reverse primer: 5'-TGTAATGAATCATAGGACCTGTTGTCAAAA-3').

Human hypoxanthine phosphoribosyltransferase 1 gene (HPRT1) (Hs99999909\_m1; Applied Biosystem) was used as an endogenous control. The comparative Ct method ( $2^{-\Delta\Delta/Ct}$  method) was used to determine changes in relative levels of different genes (4).

### **RNA-Seq**

Total RNA was extracted from NSCLC cell lines using Qiazol (Qiagen, IT), purified from DNA contamination through a DNase I (Qiagen, IT) digestion step and further enriched by Qiagen RNeasy columns. Integrity of the RNA was assessed by Agilent 2100 Bioanalyzer (Agilent Technologies, CA). RNA libraries for sequencing were generated in triplicate using 500 ng of RNA for each sample according to the Illumina TruSeq Stranded Total RNA kit with an initial ribosomal depletion step using Ribo Zero Gold (Illumina, CA). The libraries were sequenced in paired-end mode (2x75 bp) with NextSeq 500 (Illumina, CA).

### **Assay for transposase-accessible chromatin using sequencing (ATAC-seq)**

To investigate chromatin accessibility dynamics, the ATAC-seq protocol developed by Buenrostro et al. was used, with minor modifications (5).

### **Luciferase Reporter Assay**

Cells were seeded in 24-well plates, transfected with indicated siRNAs and 24 hours later, transfected with specific inducible reporter constructs (NF- $\kappa$ B #CCS-013L or IRF-1 #CCS-7040L Signal Reporter Assay Kits, QIAGEN) using Lipofectamine™ 2000 Transfection Reagent (#116680191, Invitrogen). Luciferase assays were developed 48 hours later with Dual-Glo Luciferase Assay System (Promega), following the manufacturer's protocol. The luminescence was detected using the GloMax96 Microplate Luminometer (Promega, WI). Firefly luciferase activities were normalized to Renilla luciferase activities.

### **Western Blot analysis**

Protein extraction and Western blot analyses were carried out as previously described (6). Nuclear and cytoplasmic fractions were prepared using NE-PER Nuclear Cytoplasmic Extraction Reagents kit (#78835, Pierce). Protein concentrations were determined by bicinchoninic acid (BCA) assay (#23225, Pierce) according to the manufacturer's instructions. The following antibodies were used: hMENA<sup>11a</sup> Mouse antibody (6) and anti-Pan hMENA (6); from Cell Signalling Technology: anti-phospho-STAT-1 (Tyr701) Rabbit antibody (#9167, RRID:AB\_561284; 1:1000), anti-STAT-1 Rabbit antibody (#14994, RRID:AB\_2737027; 1:1000), anti-PD-L1 XP® Rabbit antibody (#13684, RRID:AB\_2687655; 1:1000), anti-IRF-1 Rabbit antibody (#8478, RRID:AB\_10949108; 1:1000), anti-phospho-IRF-3 (Ser396) Rabbit antibody (#4947, RRID:AB\_823547; 1:1000), anti-IRF-3 Rabbit antibody (#4302, RRID:AB\_1904036; 1:1000), anti-STING Rabbit antibody (#13647, RRID:AB\_2732796; 1:1000), anti-phospho-STING (Ser366) Rabbit antibody (#19781, RRID:AB\_2737062; 1:1000), anti-RIG-I Rabbit antibody (#3743, AB\_2269233; 1:1000), anti-Lamin A/C Mouse antibody(#4777, RRID:AB\_10545756; 1:2000), anti- $\alpha$ -Tubulin Rabbit antibody (#2125, RRID:AB\_2619646; 1:1000); from BD Transduction Laboratories: anti-E-cadherin Mouse antibody (#610182, RRID:AB\_397581; 1:2000); from Sigma-Aldrich: anti- $\beta$ -actin Mouse antibody (#A4700, RRID:AB\_476730; 1:2500); from Santa Cruz Biotechnology anti-HSP70 Mouse antibody (#sc-24, RRID:AB\_627760; 1:2000). Secondary antibodies used were from Bio-Rad: goat anti-Rabbit HRP (#170-6515, RRID:AB\_11125142; 1:2000) and goat anti-Mouse HRP (#170-6516, RRID:AB\_11125547; 1:2000).

### **Harvesting tumor-conditioned media**

To obtain culture supernatants for the generation of tumor-conditioned media (CM), approximately  $2 \times 10^5$  cancer cells/well were plated in six-well plates and grown to 80% confluence. Cells were grown in serum-free media for 24 h. CMs were harvested, centrifuged to remove non-adherent cells and debris.

### **Cytokine analysis**

Levels of IFN $\beta$  (PBL, #41415-1) and of IL6 (#D6050), IL8 (#D8000C), CXCL1(#DGR00B) (all from R&D Systems) were determined by ELISA assays according to the manufacturer's protocol.

Levels of 40 different chemokines and cytokines were evaluated by Pro Human Cytokine 40-Plex Assays panel (Bio-Rad, Hercules, CA, USA), according to the manufacturer's instructions. Cytokines were quantified on the Luminex platform using the Bio-Plex MagPix instrument (Bio-Rad, Hercules, CA, USA) and the Bio-Plex Manager MP software was used for data acquisition and analysis. All the samples were run in duplicate and ten-point standard curve, positive, negative sample were run for each cytokine. Determinations that were designated "Out of Range Below" (i.e. below the limit of quantification) by the analytical software were arbitrarily filled with a zero value.

### **Immunofluorescence**

Cells ( $3 \times 10^5$ ) were cultured on glass coverslips pre-coated with 0,2 % gelatine and grown for 48 h before fixing and permeabilizing as previously reported (6). Cells were stained with: anti-IRF-1 Mouse antibody (sc-137061, RRID:AB\_2126721; 1:100), anti-IRF-2 Mouse antibody (sc-101069, RRID:AB\_1124709; 1:250) from Santa Cruz Biotechnology; anti-E-Cadherin Mouse antibody (#610182, RRID:AB\_397581; 1:200) and anti-ZO-1 Mouse antibody (#610967, RRID:AB\_398280; 1:250) from BD Transduction Laboratories; anti-Vimentin Rabbit antibody (#5741, RRID:AB\_10695459; 1:100; Cell Signalling Technology). Secondary antibodies used were Alexa Fluor 488-conjugated donkey anti-mouse (#A11017, RRID:AB\_143160; 1:250) or Alexa Fluor 594-conjugated donkey anti-rabbit antibodies (#A1107, RRID:AB\_1420572; 1:250). Actin filaments were stained with Alexa Fluor™ 594 Phalloidin (1:250) all from Thermo Fisher Scientific. The glass coverslips were mounted with the VECTASHIELD® MOUNTING MEDIUM with DAPI (4'6-diamidino-2-phenylindole) (Vector Laboratories).

Fluorescence signals were captured by using a Leica DMIRE2 microscope equipped with a Leica DFC 350FX camera and elaborated by Leica FW4000 deconvolution software (Leica, Solms, Germany) or Zeiss LSM 880 with Airy scan confocal laser scanning microscope equipped with a

20× air or 63X/1.23 NA oil immersion objectives. Lasers 488 and 594 nm were used to excite the fluorophores. The Zeiss Zen control software (Zeiss, Germany) was used for image analysis

### **Senescence-Associated $\beta$ -Galactosidase (SA- $\beta$ -gal) Assay**

Cells were fixed in 2% paraformaldehyde for 15 min and treated at 37 °C with SA- $\beta$ -Gal solution: 1 mg/ml of 5-bromo-4-chloro-3-indolyl P- $\beta$ -D-galactoside (X-Gal), 40 mM citric acid/sodium phosphate (pH 6.0), 5 mM potassium ferrocyanide, 5 mM potassium ferricyanide, 150 mM NaCl, 2 mM MgCl<sub>2</sub>. Blue-stained senescent cells images were captured by a light microscopy (Leica DM IL LED).

### **Flow cytometry**

Surface-staining of cancer cell lines was performed for 30 min at 4°C using PE-CD274 mAb (#557924 BD Biosciences, RRID:AB\_647198). Surface-staining of macrophages was performed for 30 min at 4°C using various combinations of the following mAbs, all from BD Biosciences: BV786-CD16 (#563690, RRID:AB\_2744299), BV421-CD206 (#564062, RRID:AB\_2738570), BB515-CD80 (#565008, RRID:AB\_2744452), BV480-CD86 (#566131, RRID:AB\_2739530), BV605-CD11b (#562721, RRID:AB\_2737745), PE-CD274 (#557924, RRID:AB\_647198), APC-CD273 (#557926, RRID:AB\_647162), BV510-HLA-DR (#563083, RRID:AB\_2737994), perCP-Cy5.5-CD163 (#563887, RRID:AB\_2738467) and PE-VISTA (#566669, RRID:AB\_2739762). Human Fc Block™ (#564220, BD Biosciences) was used according to manufacturer's instructions to stain macrophages before adding mAbs. Intracellular staining was performed by Intrasure kit (#641778, BD Bioscience) according to manufacturer's instructions, combining surface mAbs with the following intracellular mAbs from BD Bioscience: APC-IL10 (#554707, RRID:AB\_398582) and Alexafluor488-TGF $\beta$  (#562545, RRID:AB\_2737645). Dead cells were excluded by propidium iodide staining (#195458, MP Biomedicals) or BD Horizon™ Fixable Viability Stain 780 (FVS780) (#565388, BD Biosciences), according to manufacturer's instructions. Cells were acquired on BD

FACSCanto II and BD FACS Celesta™ flow cytometers (BD Biosciences) and analyzed using BD FACS DIVA™ and Flowjo software (BD Biosciences).

### **Computational methods**

#### **RNA-seq analysis**

RNA-sequencing data were independently analysed by following the *Kallisto* (v.0.46.0) and *Sleuth* (v.0.30.0) pipeline. Sequencing quality of each sample was assessed with *FASTQC* (v0.11.91) and summarized with *MultiQC* (v.1.9). Read quantification was performed with the function “quant” of the *Kallisto* tool (parameters: -b 100). The pseudoalignment was performed against the reference genome GRCh37 downloaded from NCBI and subsequently indexed with the function “index” of the *Kallisto* tool. Reads counts were normalized with the function “sleuth prep” and used to perform a differential analysis with the function “sleuth fit” fitting a full model. Principal component analysis (PCA) was executed pre- and post-normalization. Pre-normalized PCA was executed using the function “prcomp” of the *stats* (v.4.0.220) R package and plotted through the function “autoplot” of the *ggfortify* (v.0.4.11) R package. Post-normalized PCA was carried out with the function “plotpca” of the *Sleuth* package in R. Wald test was performed with the function “sleuth\_wt” and only those significant gene (q-value<0.05) were maintained. The beta-value obtained from the test was used to discriminate between UP (b>1) and DOWN (b<-1) regulated genes. A volcano plot showing the statistical significance (q-value) by the magnitude of change [log<sub>2</sub>(b)] of each gene was created with the *ggplot2* R package.

#### **ATAC-seq analysis**

ATAC-seq peak calling: ATAC profiles were aligned to the reference genome hg19. Reads were quality controlled with FastQC v0.11.5 and aligned to the reference genome using bowtie 2.3.4.2 (5) with default parameters. The generated sequence alignments were converted into binary files (BAM), then sorted and indexed using the SAMtools V1.7 (7). ATAC-seq peaks were generated

using MACS v2.2.5 (8) with parameters ‘--nomodel --shift -100 --extsize 200 -B --SPMR --call-summits -q 0.01’. Peaks in bedGraph format (.bdg) were converted in bigWig (.bw) format using bedGraphToBigWig tool. All peaks matching blacklisted regions were discarded from further processing. IGV (9) was used to visualize peak signals.

Global ATAC sequencing profiles: ATAC-seq global profiles of each experiment were obtained by building a master list of accessible sites for each experimental group by pooling the significant peaks in the control and treatment group with an in-house pipeline based on BEDTOOLS v2.25.0 (10) and custom BASH scripts. The master list of ATAC-seq sample groups was produced with a multistep procedure: I-To identify the common overlapping signal amongst all the samples, peaks were intersected using BEDTOOLS multiinter. II-The book-ended regions from the core signal file were merged using BEDTOOLS merge, then intersected with the original peak calls and sorted. Each master list represented the reference table used as input to ComputeMatrix v 3.1.3 tool available in the DeepTools suite (11). Relative BigWig files of each group were then used to populate the final matrix enrichment, which then was used as input to plot the global profiles with PlotProfile v3.1.3 available in DeepTools.

ATAC-seq sequencing differential analysis: Differential analysis of ATAC-seq data was obtained using an in-house workflow, which deploys the edgeR suite. After building the master list of each experimental group pooling control and treatment as described above, we assigned the raw counts from to each relative locus using bedtoolsmulticov v2.29.2. Raw counts were previously deprived of duplicates utilising MarkDuplicates tool available in GATK suite v4.1.4.1(12).Counts were processed and normalized with the TMM method. The differential analysis was performed using an in-house script which relies on the edgeR "exactTest" function. Data were adjusted for Benjamini Hochberg correction. The sites showing both  $FDR < 0.05$  and  $\log_2(\text{fold change}) > |1.2|$  were considered significant.

### **Nanostring transcriptome data analysis**



Raw counts were used to perform a Differential Gene Expression Analysis (DGEA) between PRs and GRs applying a likelihood-ratio test (generalized linear model) with the R package NanostringDiff (13). Genes with  $\log_{2}(\text{FC}) \geq 0.5$  or  $\leq -0.5$  and  $q\text{-value} \leq 0.1$  were considered modulated and were taken into consideration for downstream analyses. Raw counts were normalized using the geNorm method (14) using normalization factors computed from positive and negative control probes and housekeeping genes included in the panel. For each patient, scores for an IFN gene signature (provided by NanoString), an IFN module signature (15), a Macrophage gene signature (provided by NanoString, based on CD84, CD68, CD163 and MS4A4A genes) and an IFN-related Macrophage gene signature (16) were calculated by averaging the expression values of the genes in each signature. The distributions of the signature scores were compared using a two-tailed Student's t test.

PD-L1 score (Supplementary Table 2) was evaluated by grouping the normalized counts from the Nanostring profiling into 3 expression level groups based on the ranking of CD274 expression levels. All plots and statistical analyses were performed in the R environment v4.0.1 [R Core Team (2021). *R: A language and environment for statistical computing*. R Foundation for Statistical Computing, Vienna, Austria. URL <https://www.R-project.org/>.] using in-house scripts.

### **Clinical validation in advanced NSCLC from the POPLAR and OAK trials**

To demonstrate that ESRP1 and ENAH gene expressions could serve as a proxy for hMENA<sup>11a</sup> splicing variant levels, we investigated the association between the expression levels of ESRP1 and ENAH and the expression levels of hMENA<sup>11a</sup> (ENST00000366844.7) in the 1.011 samples of the Lung Cancer cohort from The Cancer Genome Atlas database (17).

Firstly, samples were stratified based on hMENA<sup>11a</sup> transcript expression using the tertiles as thresholds and considering as “HIGH” the patients with expression levels in the third tertile (above the 66<sup>th</sup> percentile) and “LOW” the patients with expression levels in the first tertile (below the 33<sup>rd</sup> percentile). Then, considering that ESRP1 regulates the inclusion of 11a exon (18), samples were

stratified based on ENAH and ESRP1 genes expression levels using tertiles as thresholds and considering “HIGH” the patients with both expression levels of ESRP1 above the 33<sup>rd</sup> percentile and expression levels of ENAH above the 66<sup>th</sup> percentile. Conversely, patients with both expression levels of ESRP1 below the 33<sup>rd</sup> percentile and expression levels of ENAH below the 66<sup>th</sup> percentile were considered as “LOW”. Thus, a confusion matrix was built to assess the accuracy, precision, and recall of the prediction. To ensure the robustness of our stratification model, we performed 1000 iterations of the same analysis for each randomly sampled subset consisting of 100, 250, 500, and 750 patients (Figure S6). Results showed an average precision, accuracy and recall scores of 0.95, 0.87 and 0.83 respectively, suggesting that the combined expressions of ENAH and ESRP1 genes could be used as a surrogate of hMENA<sup>11a</sup> splicing variant level, thereafter named ENAH-11a.

OAK and POPLAR datasets were obtained from the European Genome-Phenome Archive (EGA) after formal request. Patients who underwent ICB therapy were stratified based on ENAH-11a expression (as above described) and Best Confirmed Overall Response (BCOR) classes, considering Partial Response (PR), Complete Response (CR) or Stable Disease (SD) as “Good Response” (GR), and Progressive Disease (PD) as “Poor Response” (PR).

The IFN and Macrophage signature genes [provided by NanoString and by Barkley and Ma (15, 16) were log<sub>2</sub>-scaled, and the average values were used as scores for the respective gene signatures. GR samples showing high expression of ENAH-11a, and PR samples showing low expression of ENAH-11a, were selected and compared, using two-tailed Student’s T test to assess significantly different distributions. The CD8 T cell exhaustion signature genes from (19) were log<sub>2</sub>-scaled and the average values were used as score. GR and PR samples were compared using two-tailed Student’s T test to assess significantly different distributions.

### Cell type deconvolution

Cell type deconvolution of the Nanostring internal cohort was derived from the Nanostring nCounter® Advanced Analysis Software, using default parameters.

Cell type deconvolution of PR/GR patients from the OAK and POPLAR studies stratified as above was performed with two different computational tools: CibersortX (20) and MCP-counter (21). In details, for CibersortX absolute mode, batch correction and 1000 permutations were used as parameters. Three relevant immune cell classes were obtained aggregating cells corresponding to distinct immune cell types as follows: Macrophages: “Macrophages M0”, “Macrophages M1” and “Macrophages M2”; Dendritic cells (DCs): “Dendritic cells activated” and “Dendritic cells resting”; CD8 T cells: “CD8 T cells”. For MCP-counter default parameters for RNA-Seq data were used and “Monocytic lineage”, “Myeloid Dendritic cell” and “CD8 T cell” abundances were selected for the analysis. For each immune cell class the abundance score was plotted comparing GR and PR samples using two-tailed Student’s T test to assess significantly different distributions.

### **Additional references**

1. Castiello L, Zevini A, Vulpis E, Muscolini M, Ferrari M, Palermo E, et al. An optimized retinoic acid-inducible gene I agonist M8 induces immunogenic cell death markers in human cancer cells and dendritic cell activation. *Cancer Immunol Immunother.* 2019;68(9):1479-92.
2. Di Modugno F, Spada S, Palermo B, Visca P, Iapicca P, Di Carlo A, et al. hMENA isoforms impact NSCLC patient outcome through fibronectin/ $\beta$ 1 integrin axis. *Oncogene.* 2018;37(42):5605-17.
3. Trono P, Di Modugno F, Circo R, Spada S, Di Benedetto A, Melchionna R, et al. hMENA(11a) contributes to HER3-mediated resistance to PI3K inhibitors in HER2-overexpressing breast cancer cells. *Oncogene.* 2016;35(7):887-96.
4. Livak KJ, Schmittgen TD. Analysis of relative gene expression data using real-time quantitative PCR and the 2<sup>-Delta Delta C(T)</sup> Method. *Methods.* 2001;25(4):402-8.

5. Buenrostro JD, Wu B, Chang HY, Greenleaf WJ. ATAC-seq: A Method for Assaying Chromatin Accessibility Genome-Wide. *Curr Protoc Mol Biol.* 2015;109:21.9.1-9.9.
6. Di Modugno F, Iapicca P, Boudreau A, Mottolèse M, Terrenato I, Perracchio L, et al. Splicing program of human MENA produces a previously undescribed isoform associated with invasive, mesenchymal-like breast tumors. *Proc Natl Acad Sci U S A.* 2012;109(47):19280-5.
7. Langmead B, Salzberg SL. Fast gapped-read alignment with Bowtie 2. *Nat Methods.* 2012;9(4):357-9.
8. Li H, Handsaker B, Wysoker A, Fennell T, Ruan J, Homer N, et al. The Sequence Alignment/Map format and SAMtools. *Bioinformatics.* 2009;25(16):2078-9.
9. Zhang Y, Liu T, Meyer CA, Eeckhoute J, Johnson DS, Bernstein BE, et al. Model-based analysis of ChIP-Seq (MACS). *Genome Biol.* 2008;9(9):R137.
10. Robinson JT, Thorvaldsdóttir H, Winckler W, Guttman M, Lander ES, Getz G, et al. Integrative genomics viewer. *Nat Biotechnol.* 292011. p. 24-6.
11. Quinlan AR, Hall IM. BEDTools: a flexible suite of utilities for comparing genomic features. *Bioinformatics.* 2010;26(6):841-2.
12. Ramírez F, Dündar F, Diehl S, Grüning BA, Manke T. deepTools: a flexible platform for exploring deep-sequencing data. *Nucleic Acids Res.* 2014;42(Web Server issue):W187-91.
13. Wang H, Horbinski C, Wu H, Liu Y, Sheng S, Liu J, et al. NanoStringDiff: a novel statistical method for differential expression analysis based on NanoString nCounter data. *Nucleic Acids Res.* 2016;44(20):e151.
14. Vandesompele J, De Preter K, Pattyn F, Poppe B, Van Roy N, De Paepe A, et al. Accurate normalization of real-time quantitative RT-PCR data by geometric averaging of multiple internal control genes. *Genome Biol.* 2002;3(7):Research0034.
15. Barkley D, Moncada R, Pour M, Liberman DA, Dryg I, Werba G, et al. Cancer cell states recur across tumor types and form specific interactions with the tumor microenvironment. *Nat Genet.* 2022;54(8):1192-201.

16. Ma RY, Black A, Qian BZ. Macrophage diversity in cancer revisited in the era of single-cell omics. *Trends Immunol.* 2022;43(7):546-63.
17. Vivian J, Rao AA, Nothhaft FA, Ketchum C, Armstrong J, Novak A, et al. Toil enables reproducible, open source, big biomedical data analyses. *Nat Biotechnol.* 35. United States 2017. p. 314-6.
18. Warzecha CC, Jiang P, Amirikian K, Dittmar KA, Lu H, Shen S, et al. An ESRP-regulated splicing programme is abrogated during the epithelial-mesenchymal transition. *Embo j.* 2010;29(19):3286-300.
19. Chu Y, Dai E, Li Y, Han G, Pei G, Ingram DR, et al. Pan-cancer T cell atlas links a cellular stress response state to immunotherapy resistance. *Nat Med.* 2023;29(6):1550-62.
20. Newman AM, Steen CB, Liu CL, Gentles AJ, Chaudhuri AA, Scherer F, et al. Determining cell type abundance and expression from bulk tissues with digital cytometry. *Nat Biotechnol.* 2019;37(7):773-82.
21. Becht E, Giraldo NA, Lacroix L, Buttard B, Elarouci N, Petitprez F, et al. Estimating the population abundance of tissue-infiltrating immune and stromal cell populations using gene expression. *Genome Biol.* 2016;17(1):218.

### **Supplementary Figures**

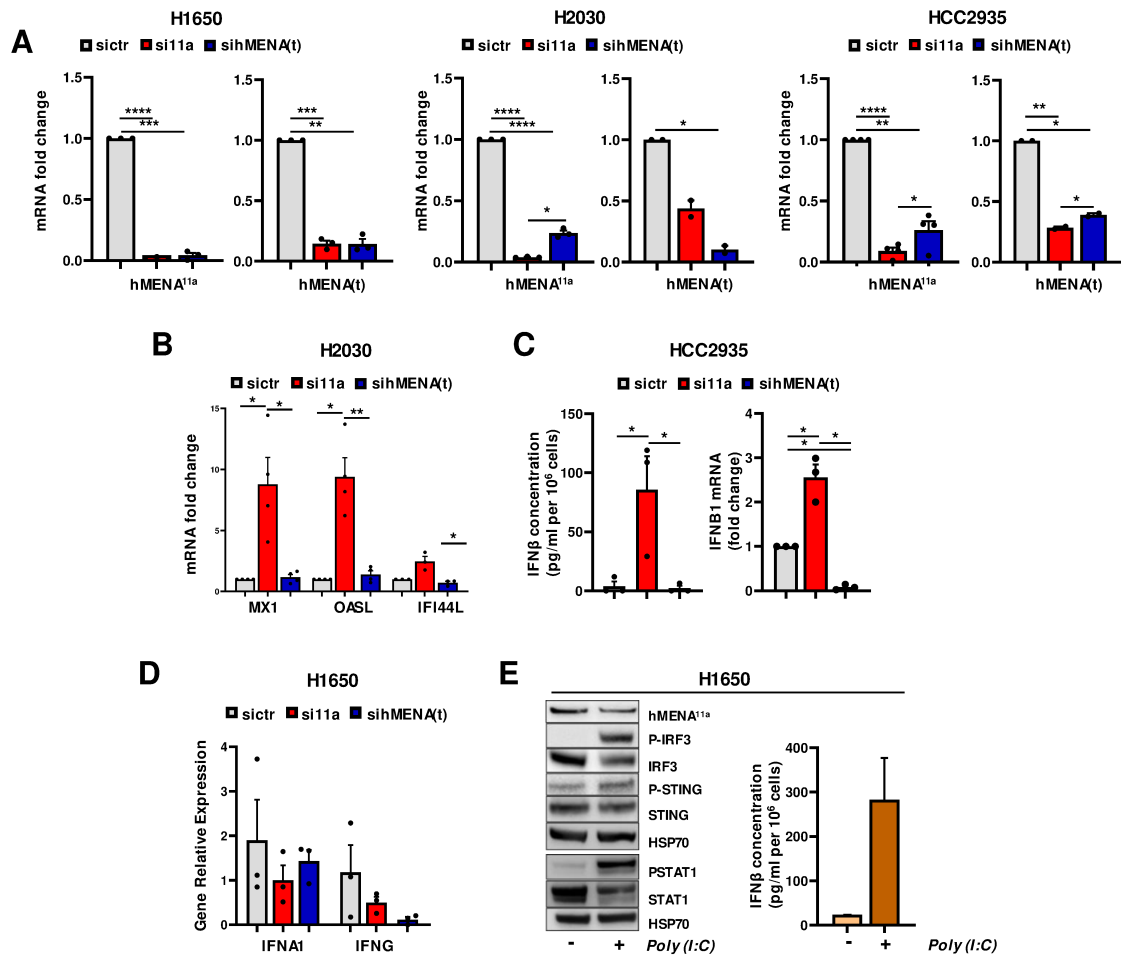

Figure S1.

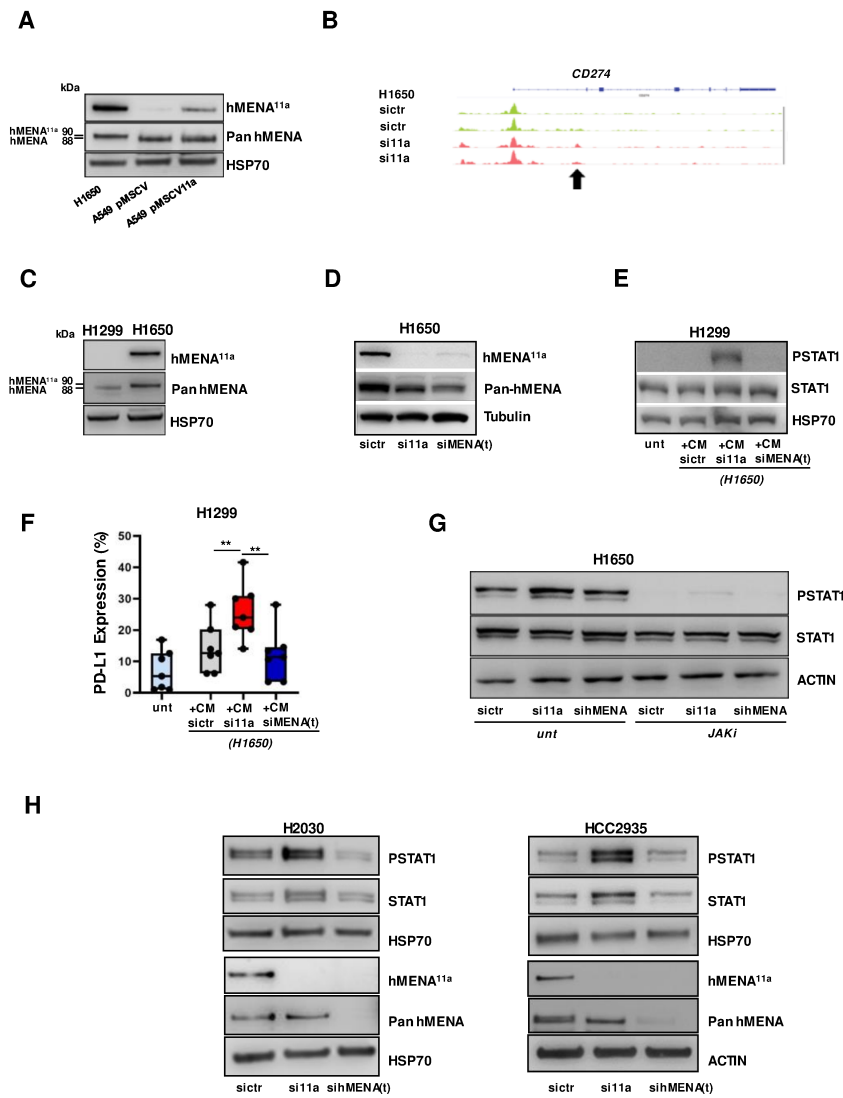

Figure S2.

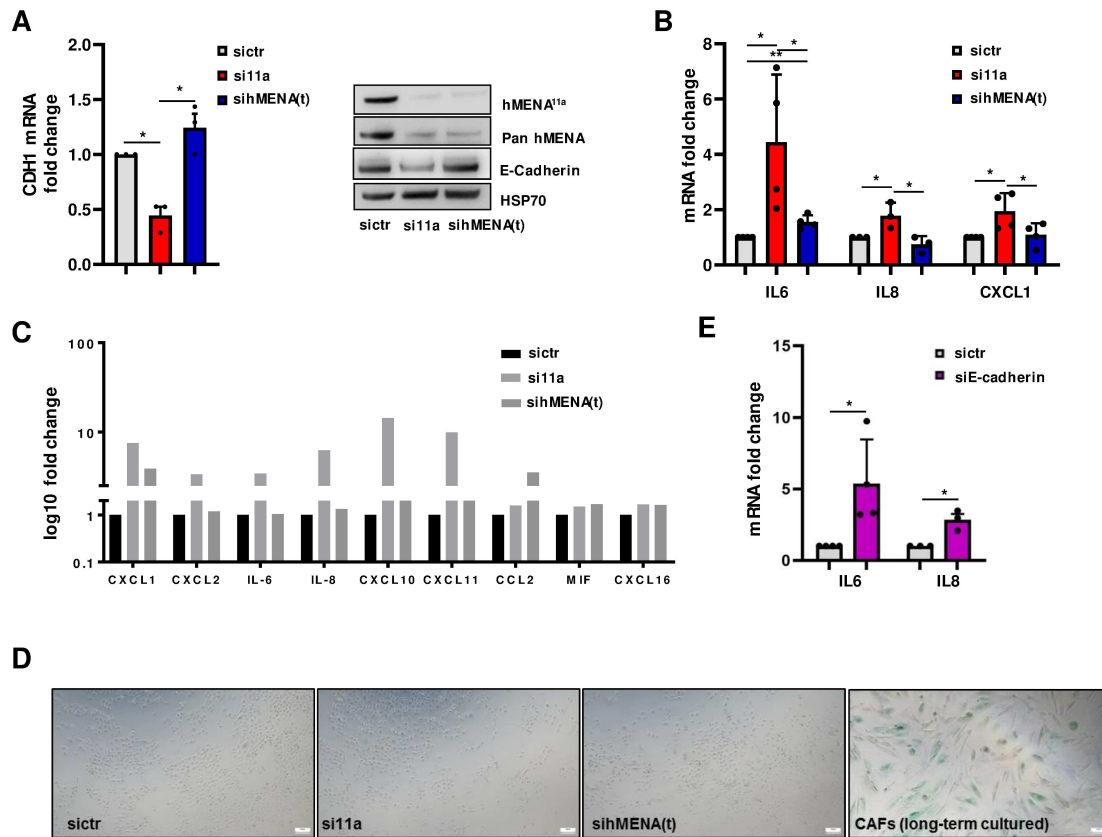

Figure S3.



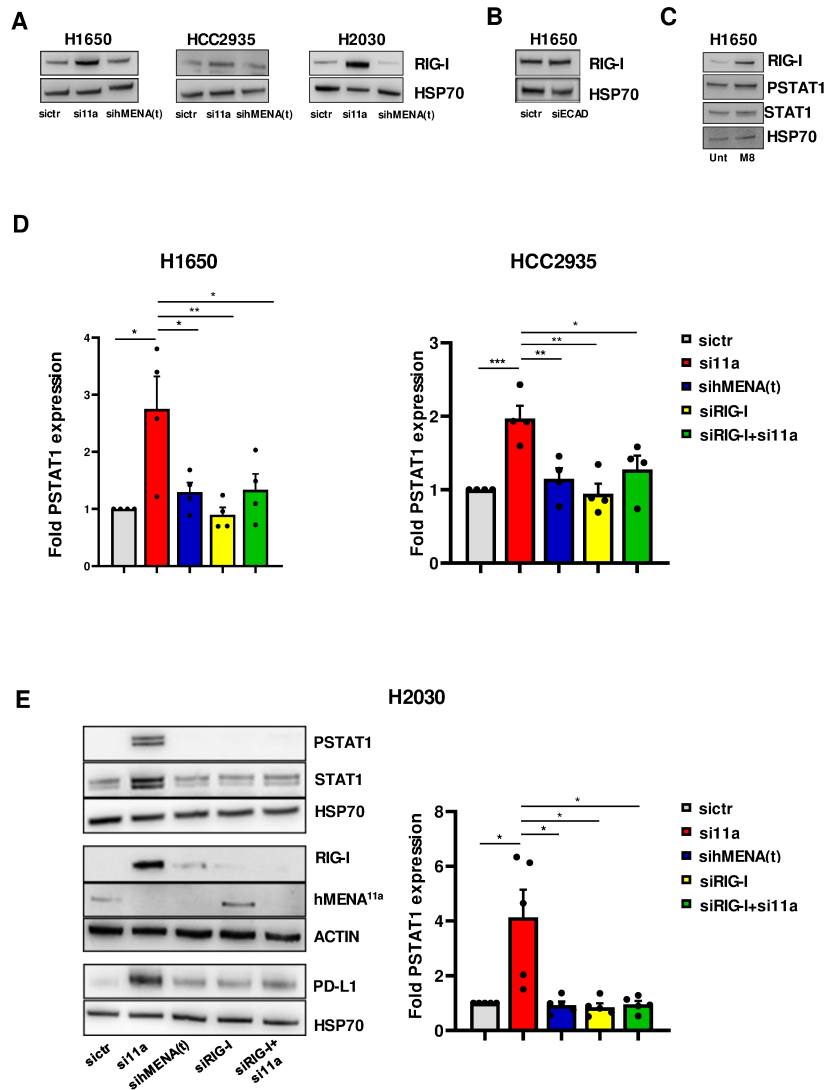

Figure S4.

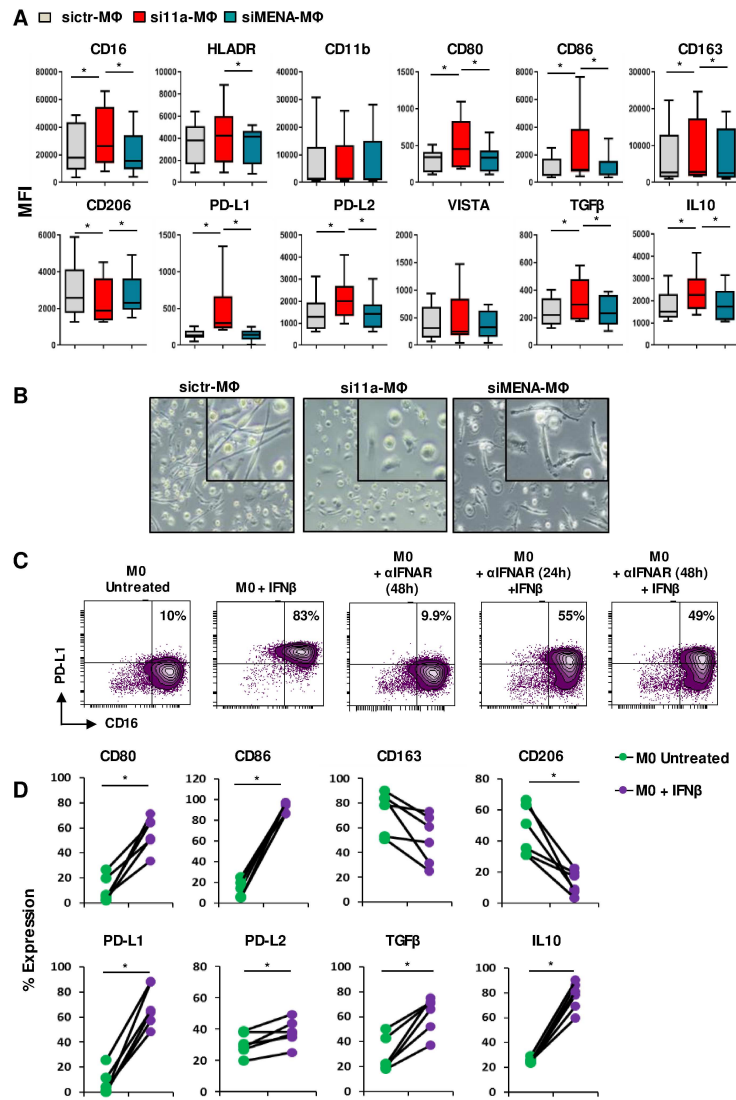

Figure S5.

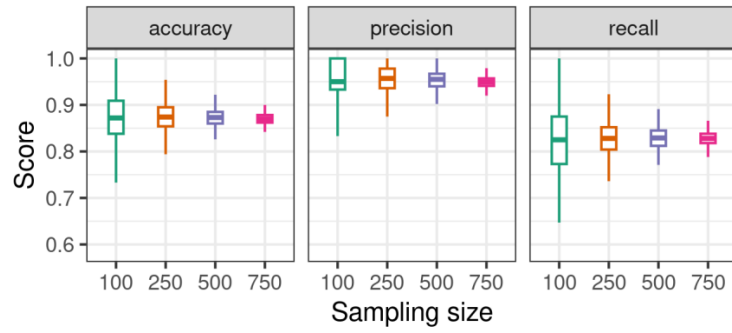

**Figure S6.**

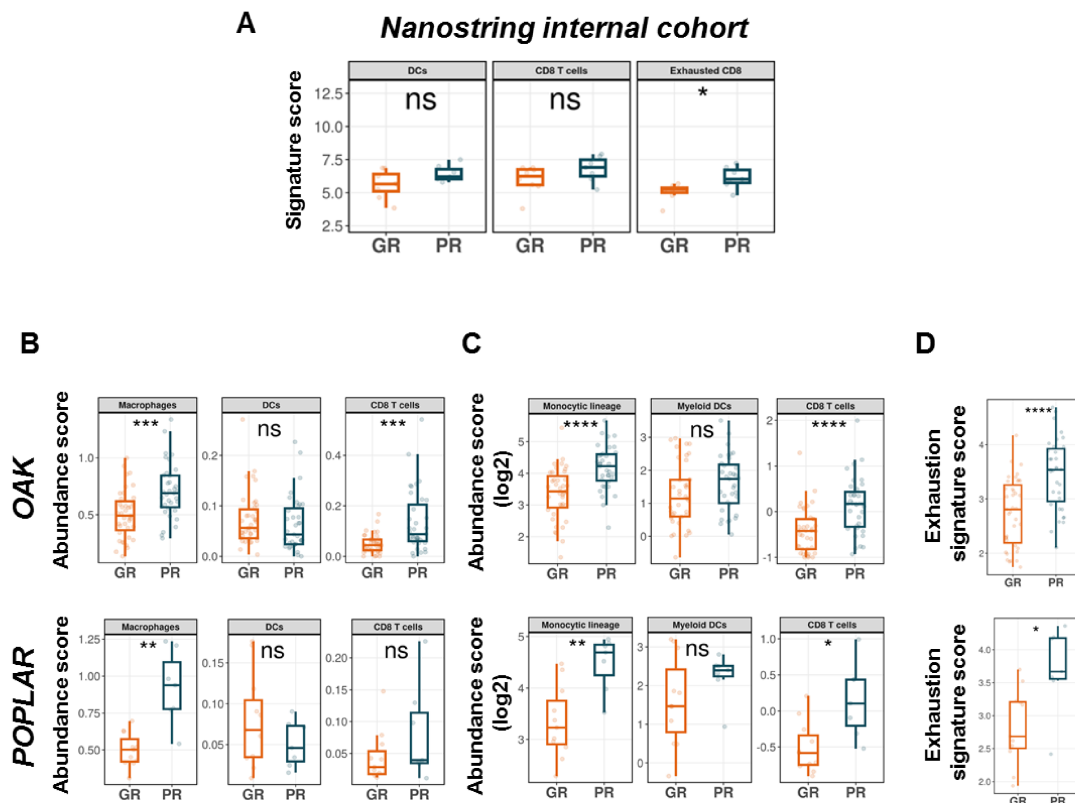

Figure S7

### Figure legends

**Figure S1.** **A** qPCR results of mRNA levels of hMENA<sup>11a</sup> and hMENA(t) in H1650, H2030 and HCC2935 sictr, si11a and sihMENA(t) cells. **B** qPCR results of mRNA levels of selected genes in sictr, si11a and sihMENA(t) H2030 cells. **C** Levels of IFN $\beta$  in supernatants evaluated by ELISA (*left*) and of IFNB1 mRNA by qRT-PCR (*right*) expressed as fold-change relative to control in HCC2935 sictr, si11a, sihMENA(t) cells. **D** qPCR results of mRNA levels of IFN $\alpha$  and IFN $\gamma$  in H1650 cells treated as in (A). **E Left panel:** Western blotting of H1650 cells, untreated or treated with polyinosinic acid-polycytidylic acid Poly(I:C), 100  $\mu$ g/ml for four hours. **Right panel:** levels of IFN $\beta$  analyzed by ELISA assay in supernatants of H1650 cells untreated or treated with Poly(I:C), 100  $\mu$ g/ml for 24 hours. **A, B, C, D:** P values were calculated by two-tailed Student's t test.

**Figure S2.** hMENA<sup>11a</sup> affects PD-L1 expression in NSCLC cell lines. **A** hMENA isoform expression levels analyzed by western blotting in H1650 and A549 pMSCV or pMSCV11a. **B** ATAC-Seq analysis of sictr and si11a H1650 cells indicates an open chromatin region (arrow) in the *CD274* locus in si11a cells. **C** hMENA isoform expression levels in H1299 and H1650 NSCLC cell lines analyzed by western blotting with specific antibodies. **D** hMENA isoform expression levels

analyzed by western blotting in sictr, si11a and sihMENA(t) H1650 cells, whose conditioned medium (CM) was used to treat H1299 cells as shown in (E). E STAT1 phosphorylation analyzed by western blotting in H1299 NSCLC cell line, untreated or treated for 24 hours with CM derived from sictr, si11a and sihMENA(t) H1650 cells. F PD-L1 expression in H1299 cells untreated or treated as in (E) analyzed by flow cytometry analysis. G Western blotting of sictr, si11a and sihMENA(t) H1650 cells, untreated (A) or treated with JAK inhibitor (5  $\mu$ M) for 72 hours (B). H Western blotting of sictr, si11a and sihMENA(t) in H2030 and HCC2935 cells. F: P values were calculated by two-tailed Student's t test.

**Figure S3.** A E-cadherin expression at mRNA (*left*) and protein (*right*) levels analyzed in sictr, si11a and sihMENA(t) H1650 cells by qRT-PCR and western blot, respectively. B qPCR results of mRNA levels of the indicated genes evaluated in H1650 cells, treated as in (A). C Levels of the indicated chemokines and cytokines in supernatants of sictr, si11a and sihMENA(t) H1650 cells quantified by Pro Human Cytokine 40-Plex Assays panel. D Senescence-Associated  $\beta$ -Galactosidase (SA- $\beta$ -gal) Assay:  $\beta$ gal staining of H1650, treated as in (A). Long-term cultured CAFs were used as an experimental control. E qRT-PCR results of mRNA levels of the indicated genes in sictr and siE-Cadherin H1650 cells. A, B, E: P values were calculated by two-tailed Student's t test.

**Figure S4.** A Western blotting analysis of sictr, si11a and sihMENA(t) H1650, HCC2935, H2030 cells. Anti-HSP70 was used as loading control. B Western blotting analysis of sictr and siE-cadherin (siE-cad) H1650 cells. C Western blotting analysis of H1650 cells untreated or treated with M8 (1 $\mu$ g/ml). D Levels of PSTAT1 in H1650 (*left*) and HCC2935 (*right*) cells were quantified by densitometry analysis using ImageJ and normalized to their respective actin or HSP70 levels and then expressed as fold change versus sictr. E (*left*) Western blotting analysis of sictr, si11a, sihMENA(t) siRIG-I (transfected with specific RIG-I siRNA) and siRIG-I+si11a H2030 cells. Anti-HSP70 was used as loading control. Representative blots of three independent experiments are reported. (*right*) Levels of PSTAT1 in H2030 cells were quantified by densitometry analysis using ImageJ and normalized to their respective HSP70 and then expressed as fold change versus sictr.

**Figure S5.** A Analysis by flow cytometry of expression levels of macrophage markers in sictr-M $\Phi$ s, si11a-M $\Phi$ s, siMENA-M $\Phi$ s, in terms of MFI (N = 9). B Representative phase contrast images showing morphological differences of sictr-M $\Phi$ s, si11a-M $\Phi$ s, siMENA-M $\Phi$ s respectively. C Representative dot-plots of the expression level of PD-L1 vs CD16 in M $\Phi$ s treated for 24 or 48 hours with anti-IFNAR (1 $\mu$ g/ml) and untreated or treated with IFN $\beta$  (50ng/ml) for 24 hours. Percentages of PD-L1+CD16+ cells are indicated. D Analysis by flow cytometry of selected macrophage marker expression levels in M0-M $\Phi$  stimulated for 24 hours with recombinant IFN $\beta$  (N = 6). Statistical significance was determined using Wilcoxon rank test, with Bonferroni correction for multiple comparison. \* P  $\leq$  0.05

**Figure S6.** Boxplots showing accuracy, precision and recall scores for the 1000 iterations of the randomly sampled subset comprising 100, 250, 500, and 750 patients. Accuracy= (TruePositives + TrueNegatives)/(Positives + Negatives); Precision = TruePositives / (TruePositives + FalsePositives); Recall= TruePositives / (TruePositives + FalseNegatives). Shown in the boxplots are the medians (horizontal lines), 25th to 75th percentiles (box outlines), and highest and lowest values within 1.5 times the interquartile range (vertical lines).

**Figure S7.** **A** Boxplots showing signature score distributions of three relevant immune cell type populations as calculated by Nanostring nCounter® Advanced Analysis Software suite in 8 good responder (GR) and 7 poor responder (PR) patients. **B-C.** Boxplots showing abundance score distributions of three relevant immune cell type populations obtained from CibersortX (**B**) and MCP-Counter (**C**) in OAK (upper panels) and POPLAR (lower panels) patients stratified as in Figure 6. **D** Boxplots showing the average of the exhaustion gene signature from (19), in OAK (upper panel) and POPLAR (lower panel) patients stratified as in Figure 6. **A-D.** Median and 1.5 IQR were plotted along with distribution comparison significance. *P* values were calculated using Student's test. \*  $P \leq 0.05$ , \*\* $P \leq 0.01$ , \*\*\* $P \leq 0.001$ , \*\*\*\* $P \leq 0.0001$ . ns, not significant.

**Supplementary Table 1. Mutational status of NSCLC cell lines**

| Gene \ Cell lines | NCI-H1650    | HCC2935             | NCI-H2030 | NCI-H1975         | A549 | NCI-H1299 |
|-------------------|--------------|---------------------|-----------|-------------------|------|-----------|
| <b>ALK</b>        | wt           | CNA                 | CNA       | CNA               | CNA  | wt        |
| <b>EGFR</b>       | E746-A750del | E746-T751del; S752I | wt        | L858R, T790M; CNA | wt   | wt        |
| <b>KRAS</b>       | wt           | wt                  | G12C      | CNA               | G12S | CNA       |
| <b>ROS1</b>       | CNA          | wt                  | wt        | CNA               | CNA  | CNA       |
| <b>TP53</b>       | wt           | Y220C               | G262V     | R273H; CNA        | CNA  | Deletion  |

From <https://cellmodelpassports.sanger.ac.uk/> and <https://depmap.org/portal/> ; wt: wild-type; CAN: Copy Number Alterations.

**Supplementary Table 2. Clinical-pathological characteristics of NSCLC patients**

| Patient  | Age | Sex | Histotype            | Grading | Tumor size | Nodes | Smoking history | pre-ICB treatment | ICB           | PD-L1 IHC | PD-L1 Score | Molecular Test         | EGFR status | KRAS status | ALK status | ROS1 status | Other Mutations |
|----------|-----|-----|----------------------|---------|------------|-------|-----------------|-------------------|---------------|-----------|-------------|------------------------|-------------|-------------|------------|-------------|-----------------|
| IRE-PR04 | 69  | F   | ADC                  | G3      | T2a        | N0    | No              | chemo-tarceva     | Nivolumab     | nd        | 1           | Real-Time              | wt          | nd          | nd         | nd          |                 |
| IRE-PR05 | 54  | F   | ADC                  | G3      | T4         | N2    | Yes             | chemo             | Nivolumab     | nd        | 3           | Real-Time              | wt          | nd          | nd         | nd          |                 |
| IRE-PR06 | 71  | M   | SCC and SCLC         | G2      | T1b        | N0    | Ex smoker       | chemo-RT          | Nivolumab     | nd        | 2           | nd                     | nd          | nd          | nd         | nd          |                 |
| IRE-PR07 | 59  | F   | ADC                  | G3      | T3         | N1    | Ex smoker       | chemo             | Pembrolizumab | 50%       | 2           | Oncomine™ Solid Tumour | wt          | G12D        | nd         | nd          |                 |
| IRE-GR03 | 61  | M   | ADC                  | G3      | T4         | N3    | Ex smoker       | chemo             | Nivolumab     | nd        | 2           | Oncomine™ Solid Tumour | wt          | wt          | nd         | nd          | TP53 C176F      |
| IRE-GR06 | 59  | M   | SCC                  | G2      | T2a        | N0    | Yes             | chemo-tarceva     | Nivolumab     | nd        | 2           | nd                     | nd          | nd          | nd         | nd          |                 |
| IRE-GR07 | 57  | M   | ADC                  | G3      | T3         | N2    | Yes             | RT-chemo          | Nivolumab     | nd        | 1           | Oncomine™ Solid Tumour | wt          | wt          | nd         | nd          |                 |
| IRE-GR08 | 70  | F   | ADC                  | G3      | T2a        | N0    | Yes             | chemo-tarceva     | Pembrolizumab | 10%       | 2           | Oncomine™ Focus Assay  | wt          | wt          | nd         | nd          |                 |
| IRE-GR09 | 60  | M   | SCC                  | G3      | T3         | N0    | Ex smoker       | chemo-RT          | Pembrolizumab | 60%       | 3           | nd                     | nd          | nd          | nd         | nd          |                 |
| IRE-GR10 | 66  | M   | ADC                  | G3      | T2a        | N1    | nd              | chemo             | Pembrolizumab | 60%       | 3           | Oncomine™ Focus Assay  | wt          | wt          | nd         | nd          |                 |
| HUM-GR05 | 43  | F   | ADC                  | G2      | T1b        | N0    | No              | chemo             | Nivolumab     | POS       | 1           | nd                     | wt          | nd          | NEG        | NEG         |                 |
| HUM-GR10 | 74  | M   | SCC                  | G2      | T2         | N0    | Ex smoker       | chemo             | Nivolumab     | nd        | 1           | nd                     | nd          | nd          | nd         | nd          |                 |
| HSR-PR06 | 60  | M   | ADC (Lymphnode mets) | nd      | nd         | nd    | Ex Smoker       | chemo             | Nivolumab     | nd        | 3           | Sequenom               | wt          | wt          | nd         | nd          |                 |
| HSR-PR07 | 57  | F   | ADC (Pleural mets)   | nd      | nd         | nd    | Yes             | chemo-alimta      | Nivolumab     | 0%        | 1           | Sequenom               | wt          | nd          | nd         | nd          |                 |
| HSR-PR10 | 67  | M   | ADC (Lung mets)      | nd      | nd         | nd    | Ex smoker       | chemo-RT          | Nivolumab     | 0%        | 3           | Sequenom               | wt          | wt          | nd         | nd          |                 |

IRE: Regina Elena National Cancer Institute; HUM: Humanitas Research Hospital; HSR: San Raffaele Hospital; GR: good responder; PR: poor responder (as defined in Mat and Met); ADC: Adenocarcinoma; SCC: Squamous cell carcinoma; SCLC: Small Cell Lung Cancer; met: metastasis; RT: Radiotherapy; nd: Not determined; wt: wild type. PD-L1 Score based on Nanostring normalized counts.
