# Supplementary material for: hMENA isoforms regulate cancer intrinsic type I IFN signaling and extrinsic mechanisms of resistance to immune checkpoint blockade in NSCLC
Source: PubMed Central journal article supplement — J Immunother Cancer. 2023 Aug 23;11(8):e006913. doi: 10.1136/jitc-2023-006913 (PMC10450042; doi:10.1136/jitc-2023-006913), 2023-08-23
Supplement: jitc-2023-006913supp003.pdf [file jitc-2023-006913supp003.pdf]

### hMENA isoforms regulate cancer intrinsic Type I IFN signaling and extrinsic mechanisms of resistance to immune checkpoint blockade in NSCLC

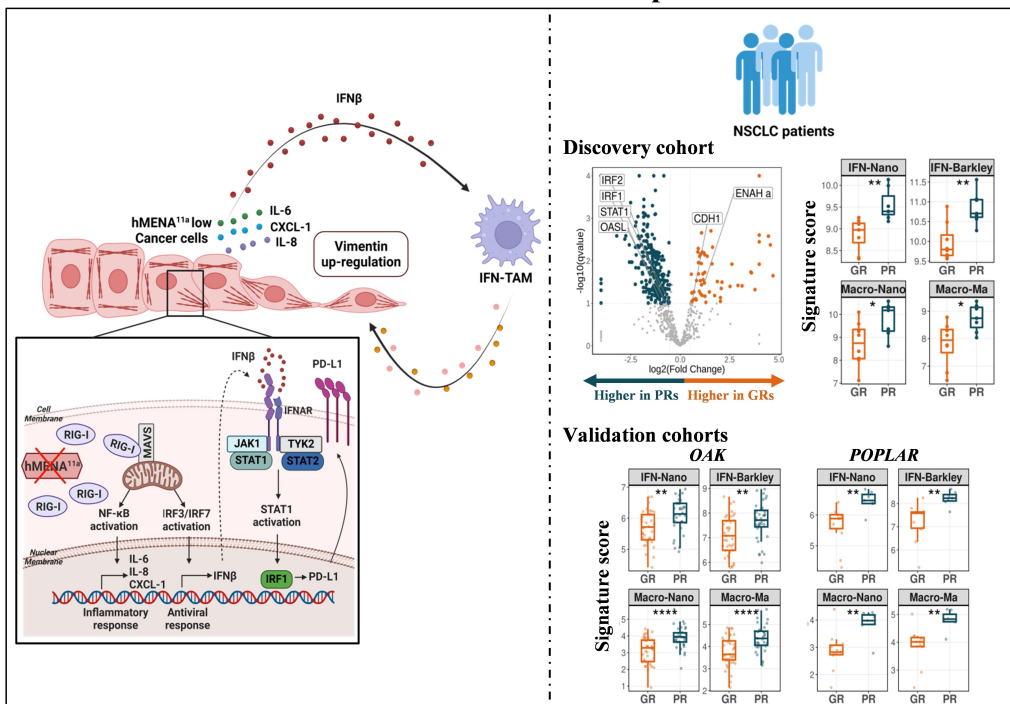

**Authors**

Paola Trono\*, Annalisa Tocci\*, Belinda Palermo, Anna Di Carlo, Lorenzo D’Ambrosio, Daniel D’Andrea, Francesca Di Modugno, Francesca De Nicola, Frauke Goeman, Giacomo Corleone, Sarah Warren, Francesca Paolini, Mariangela Panetta, Isabella Sperduti, Silvia Baldari, Paolo Visca, Silvia Carpano, Federico Cappuzzo, Vincenzo Russo, Claudio Tripodo, Paolo Zucali, Vanesa Gregorc, Federica Marchesi, Paola Nisticò

**Correspondence**

[paola.nistico@ifo.it](mailto:paola.nistico@ifo.it); [paola.trono@cnr.it](mailto:paola.trono@cnr.it)

**In Brief**

Low expression of hMENA<sup>11a</sup> isoform activates IFNβ secretion via the viral sensor RIG-I, IFN-macrophages and a paracrine loop which favours EMT in cancer cells. Low hMENA<sup>11a</sup> expression, high IFN and macrophage scores identify poor responders among ICB-treated NSCLC patients.
